# Supplementary material for: Monodisperse core–shell melamine–formaldehyde polymer-modified silica microspheres prepared using a facile microwave-assisted method
Source: Royal Society of Chemistry journal article supplement (doi:10.1039/c7nj02266b), 2017-01-01
Supplement: c7nj02266b1.pdf [file c7nj02266b1.pdf]

## Supporting Information for

# Monodisperse melamine-formaldehyde polymer-modified silica core-shell microspheres prepared through a facile microwave-assisted method

Houmei Liu,<sup>a,c</sup> Tianhang Liu,<sup>b</sup> Makoto Takafuji,<sup>b</sup> Hongdeng Qiu<sup>a\*</sup> and Hiroataka

Ihara<sup>b\*</sup>

<sup>a</sup>Key Laboratory of Chemistry of Northwestern Plant Resources and Key Laboratory for Natural Medicine of Gansu Province, Lanzhou Institute of Chemical Physics, Chinese Academy of Sciences, Lanzhou 730000, China.

<sup>b</sup>Department of Applied Chemistry and Biochemistry, Faculty of Engineering, Kumamoto University, 2-39-1 Kurokami, Kumamoto 860-8555, Japan.

<sup>c</sup>University of Chinese Academy of Sciences, Chinese Academy of Sciences, Beijing 100049, China.

**Corresponding author:** Tel: +86 931 4968877; fax: +86-931-8277088.

**E-mail address:** hdqiu@licp.cas.cn (H. Qiu); ihara@kumamoto-u.ac.jp

## Materials

Melamine, indigo carmine, methylene blue and basic red 5 were all purchased from Tokyo Chemical Industry Co., Ltd. (Tokyo, Japan). Formaldehyde (37% wt),  $\text{Na}_2\text{CO}_3$  and ethanol were obtained from Wako Chemicals (Tokyo, Japan). Silica (solid, 2  $\mu\text{m}$ ) was purchased from UBE EXSYMO CO., Ltd. (Tokyo, Japan). HCl was gotten from Nacalai Tesque (Kyoto, Japan)). Congo red was purchased from Sigma-Aldrich Co. LLC. (USA). All reagents were analytical grade and used without further purification.

## Characterization

Silica@MF was prepared under Microwave irradiation in Microwave reactor (Monowave300, Anton Paar USA Inc., USA). The mode of elemental analyzer was Micro Corder JM10, J Science Co., Japan. The thermogravimetric analysis was performed on TGA, TG/DTA6200 (Seiko Instruments Inc., Japan). IR characterization was conducted on DRIFT-IR, FT/IR-4100 (JASCO Corporation, Japan). UV/Vis spectral analysis was conducted on JASCO V-560 spectrophotometer (Japan). TEMs were conducted on field- emission scanning electron microscopy (FE-SEM, SU-8000, Hitachi, Ltd, Japan).

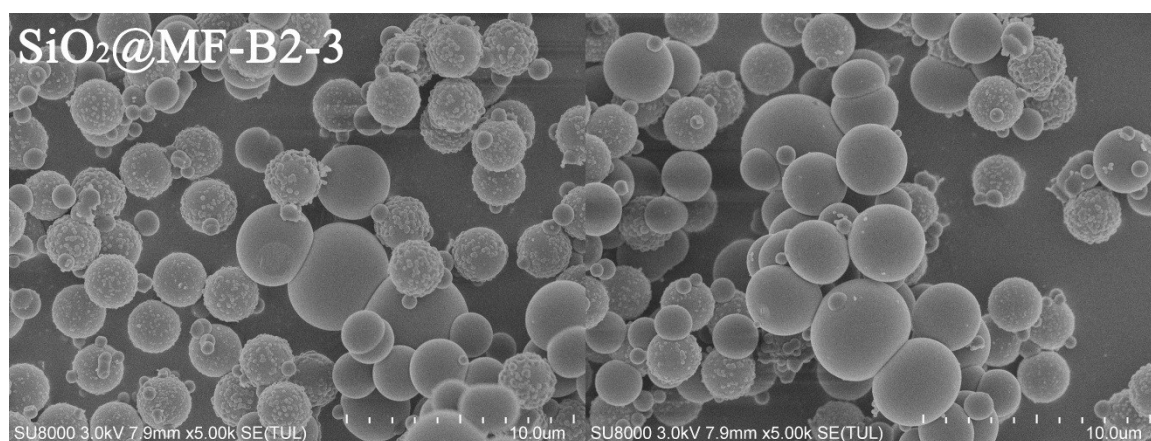

Fig. S1 The TEM result of  $\text{SiO}_2$ @MF-B2-3.

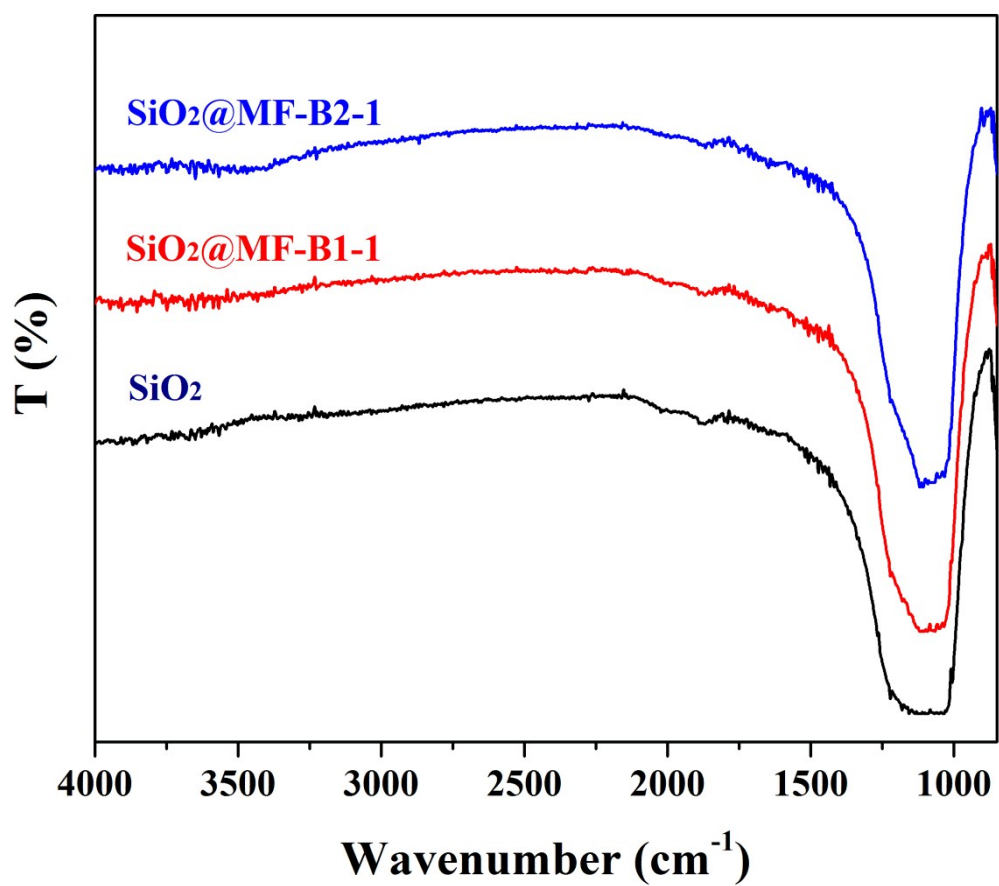

Fig. S2 The IR results of SiO<sub>2</sub>@MF-B1-1, SiO<sub>2</sub>@MF-B2-1 and silica.
